# Supplementary material
Source: publisher figshare collection journal article supplement (https://gsajournals.figshare.com/ndownloader/files/21348075)
Supplement: Supplementary file 1 [file 21348075]

## Sheet: br-induced
Table S1: genes significantly differentially regulated between w1118 and br5 leg imaginal discs
Sheet 1: genes significantly up-regulated in w1118 leg imaginal discs
gene	locus	broad5 FPKM	w1118 FPKM	log2.fold_change.	p_value	q_value	Included in bioinformatic analyses (> 1.5 fold-change, > 5 FPKM)	ActualFoldChange
adat	2L:13803626-13811472	2.34447	5.5057	1.23166	0.0003	0.00572757	yes	2.34838
Ag5r	X:14679125-14680266	46.3158	155.92	1.75123	5e-05	0.00115716	yes	3.36645
Ald	3R:22080403-22087313	172.368	323.358	0.907642	5e-05	0.00115716	yes	1.87597
Ama	3R:2588314-2590983	114.154	197.268	0.78918	5e-05	0.00115716	yes	1.72809
Argk	3L:9041961-9059127	765.245	1544.78	1.01341	5e-05	0.00115716	yes	2.01867
betaTub97EF	3R:23792729-23814089	18.1192	30.0448	0.729596	0.0035	0.0441932	yes	1.65817
Brd	3L:14965768-14966301	52.6357	171.374	1.70304	5e-05	0.00115716	yes	3.25585
C1GalTA	2L:8943453-8951200	9.81791	31.7239	1.69208	5e-05	0.00115716	yes	3.23123
CG10625	3L:5531508-5544257	27.5644	90.1924	1.7102	5e-05	0.00115716	yes	3.27206
CG10657	3L:12484924-12490298	5.51008	18.9004	1.77827	5e-05	0.00115716	yes	3.43015
CG10960	3L:12817981-12836205	40.0134	83.3561	1.0588	5e-05	0.00115716	yes	2.0832
CG11966	3R:4777710-4788683	15.3661	34.0482	1.14783	5e-05	0.00115716	yes	2.2158
CG12026	3L:1885658-1891470	25.0971	46.1696	0.879422	5e-05	0.00115716	yes	1.83964
CG13026	3L:16718609-16719269	2.42777	34.2379	3.81789	5e-05	0.00115716	yes	14.1026
CG13284	2L:16843191-16848713	4.85414	24.6676	2.34533	5e-05	0.00115716	yes	5.08177
CG13748	2R:4827919-4828641	24.1524	53.3355	1.14293	0.00215	0.0297286	yes	2.20829
CG14257	3R:22901604-22908543	3.61481	9.82452	1.44247	5e-05	0.00115716	yes	2.71785
CG14869	3R:11267964-11301915	14.9519	29.3743	0.974224	5e-05	0.00115716	yes	1.96459
CG15544	3R:26653571-26667756	20.855	40.9185	0.972358	5e-05	0.00115716	yes	1.96205
CG15628	2L:4821775-4828552	0.782825	19.2264	4.61825	5e-05	0.00115716	yes	24.5603
CG15756	X:13428505-13429836	12.8512	116.778	3.18379	5e-05	0.00115716	yes	9.08693
CG16733	3R:5077574-5078687	97.0709	268.191	1.46615	5e-05	0.00115716	yes	2.76284
CG16786	2R:19969254-19973683	45.8947	78.2217	0.769241	5e-05	0.00115716	yes	1.70437
CG1969	3R:25565566-25567674	33.3443	95.331	1.5155	5e-05	0.00115716	yes	2.85899
CG2150	3R:27589025-27590488	8.35539	39.48	2.24034	5e-05	0.00115716	yes	4.72509
CG2947	X:3684001-3686510	21.802	61.3903	1.49355	5e-05	0.00115716	yes	2.81581
CG31523	3R:291138-304828	48.3929	80.6357	0.736622	5e-05	0.00115716	yes	1.66627
CG31997	4:175334-176678	47.4606	74.1993	0.644676	0.0002	0.00398402	yes	1.56339
CG32645	X:13033238-13048957	3.90201	6.81778	0.805084	0.00235	0.0320371	yes	1.74725
CG32762	X:5394297-5395219	16.4637	515.506	4.96863	5e-05	0.00115716	yes	31.3117
CG32972	2L:14161234-14180681	4.04086	10.242	1.34177	5e-05	0.00115716	yes	2.53461
CG33138	2R:9058905-9062305	23.8966	42.7082	0.83771	0.0001	0.00220328	yes	1.78721
CG3355	2L:4651402-4652877	33.3003	53.0251	0.671143	0.00385	0.0478508	yes	1.59233
CG33671	2R:8521121-8523666	22.8781	41.7482	0.86775	5e-05	0.00115716	yes	1.82481
CG33998	2R:14605633-14642026	5.19107	44.0433	3.08482	5e-05	0.00115716	yes	8.48444
CG34193	2R:13397454-13398246	0.172012	5.72155	5.05583	0.0016	0.0235413	yes	33.2625
CG34244	3L:14228282-14228820	88.2069	172.496	0.9676	5e-05	0.00115716	yes	1.95558
CG3630	X:2060847-2066314	13.8474	22.5742	0.705061	0.0012	0.0184331	yes	1.63021
CG4078	X:5641781-5645815	4.21363	10.0292	1.25107	5e-05	0.00115716	yes	2.38018
CG4151	X:5395864-5396608	48.3135	782.867	4.01827	5e-05	0.00115716	yes	16.2039
CG42460	2L:3387897-3388496	5.1413	56.3174	3.45338	5e-05	0.00115716	yes	10.9539
CG42533	2L:7472504-7495618	5.43434	9.74147	0.842035	5e-05	0.00115716	yes	1.79258
CG42713	2L:8891488-8892180	12.4107	54.9531	2.14661	5e-05	0.00115716	yes	4.42788
CG42717	3L:16025901-16026281	33.196	408	3.61949	5e-05	0.00115716	yes	12.2906
CG42798	3R:13232705-13233256	0.915842	6.99538	2.93323	0.004	0.0489481	yes	7.6382
CG4374	3R:19234921-19297216	9.81176	16.2433	0.727264	5e-05	0.00115716	yes	1.65549
CG4670	2R:9119262-9122547	35.9573	54.4252	0.597991	0.0006	0.0103051	yes	1.51361
CG4726	2L:1143202-1147395	76.9235	128.274	0.737735	5e-05	0.00115716	yes	1.66755
CG4914	3L:14665967-14740971	24.9935	69.8954	1.48365	5e-05	0.00115716	yes	2.79654
CG4928	X:16807230-16831444	10.3095	24.3402	1.23937	5e-05	0.00115716	yes	2.36095
CG5001	2L:1186255-1196806	13.4922	21.8802	0.697497	0.00105	0.016418	yes	1.62169
CG5630	3R:16734934-16771252	42.7285	75.328	0.817986	5e-05	0.00115716	yes	1.76295
CG5639	3R:23408526-23419260	11.7303	42.4459	1.85539	5e-05	0.00115716	yes	3.61848
CG5758	2L:18120026-18138210	38.3889	57.9889	0.595087	0.00115	0.0177903	yes	1.51056
CG6357	2R:9727580-9729248	17.2539	28.2395	0.710795	0.00015	0.00313849	yes	1.6367
CG6776	3L:8511987-8513410	216.287	352.168	0.703316	5e-05	0.00115716	yes	1.62824
CG6904	3R:10967561-10973329	48.724	82.5891	0.76132	5e-05	0.00115716	yes	1.69504
CG7447	3L:4384454-4403186	24.1727	80.8625	1.74209	5e-05	0.00115716	yes	3.3452
CG7587	3R:13420107-13420783	2.09309	16.2008	2.95236	0.0007	0.0116778	yes	7.74014
CG7606	3R:13422257-13422639	2.83143	62.8244	4.47172	0.00015	0.00313849	yes	22.1882
CG7720	3R:14584957-14620876	27.6692	41.6421	0.589762	0.00035	0.00648355	yes	1.505
CG7778	2L:8346620-8350197	3.52098	21.6352	2.61933	5e-05	0.00115716	yes	6.14465
CG7860	X:15463025-15468618	15.1232	31.9859	1.08068	0.00115	0.0177903	yes	2.11502
CG7924	3L:14226568-14227710	85.0434	164.13	0.948565	5e-05	0.00115716	yes	1.92996
CG8170	2R:4905359-4918546	5.81331	11.9377	1.0381	0.0002	0.00398402	yes	2.05351
CG8460	2L:8197195-8198813	53.5685	84.1601	0.651752	5e-05	0.00115716	yes	1.57107
CG9170	X:15872135-15876974	4.33389	10.7784	1.3144	5e-05	0.00115716	yes	2.487
CG9312	3R:9591496-9592829	4.26492	14.3596	1.75142	0.0028	0.0369592	yes	3.36691
CG9416	2R:15251149-15260747	31.6054	71.2515	1.17275	5e-05	0.00115716	yes	2.25441
CG9452	3L:19494109-19496970	1.06596	11.1499	3.38681	5e-05	0.00115716	yes	10.46
CG9914	X:16197946-16202416	48.7864	87.702	0.846131	0.0009	0.014488	yes	1.79767
CG9973	3L:2848575-2871710	6.04158	23.4548	1.95688	5e-05	0.00115716	yes	3.88223
CHKov2	3R:21155251-21156924	8.26797	14.7972	0.839719	0.0007	0.0116778	yes	1.7897
Cpr12A	X:13437675-13438952	112.923	173.691	0.621188	0.00015	0.00313849	yes	1.53814
Cpr66D	3L:8633573-8636684	5.49019	19.8485	1.8541	0.00035	0.00648355	yes	3.61527
Cyp28d1	2L:5210460-5214730	3.45317	8.22687	1.25242	0.00285	0.0374492	yes	2.38241
Cys	3R:10394752-10395363	67.8391	126.922	0.903754	5e-05	0.00115716	yes	1.87093
daw	2L:2805517-2812147	10.6383	26.3207	1.30693	5e-05	0.00115716	yes	2.47415
Drip	2R:7299446-7317146	3.06803	12.6596	2.04485	5e-05	0.00115716	yes	4.1263
dro5	3L:3316808-3317144	154.654	395.33	1.35402	5e-05	0.00115716	yes	2.55622
dy	X:11663805-11672709	2.05513	12.8107	2.64005	5e-05	0.00115716	yes	6.23352
e	3R:17055551-17062900	2.61949	38.8154	3.88927	5e-05	0.00115716	yes	14.8179
E(spl)	3R:21866045-21866585	37.2536	185.568	2.31649	5e-05	0.00115716	yes	4.98121
Ect3	3R:7819896-7831194	30.4403	96.6093	1.66618	5e-05	0.00115716	yes	3.17373
Ef1alpha100E	3R:27564189-27569028	15.1527	28.8272	0.927863	5e-05	0.00115716	yes	1.90245
Eig71Ea	3L:15642219-15642755	42.6967	698.182	4.03141	5e-05	0.00115716	yes	16.3521
Eig71Eb	3L:15643035-15643641	16.4044	246.324	3.90841	5e-05	0.00115716	yes	15.0157
Eig71Ec	3L:15644578-15645352	23.8414	324.386	3.76617	5e-05	0.00115716	yes	13.606
Eig71Ed	3L:15645643-15646196	40.8084	442.189	3.43773	5e-05	0.00115716	yes	10.8357
Eig71Ee	3L:15647571-15649110	0.613124	28.2006	5.5234	5e-05	0.00115716	yes	45.9949
Eig71Ef	3L:15649754-15650501	16.2587	265.092	4.02721	5e-05	0.00115716	yes	16.3046
Eig71Eg	3L:15650727-15651258	27.3721	325.693	3.57273	5e-05	0.00115716	yes	11.8987
Eip71CD	3L:15504152-15506302	52.0289	78.6516	0.596163	0.0017	0.0245978	yes	1.51169
Eno	2L:1724973-1729629	458.47	762.988	0.734835	5e-05	0.00115716	yes	1.6642
Epac	2R:2649416-2684421	2.2229	5.5179	1.31168	0.00025	0.00480452	yes	2.4823
foxo	3R:9882673-9913698	8.5795	12.9268	0.591396	0.00045	0.00801275	yes	1.50671
fra	2R:8416560-8451691	30.5205	59.6947	0.967825	5e-05	0.00115716	yes	1.95589
Gapdh2	X:15762177-15763694	476.591	876.808	0.87951	5e-05	0.00115716	yes	1.83975
GlyP	2L:2130814-2137296	25.2442	63.011	1.31965	5e-05	0.00115716	yes	2.49606
grh	2R:13690293-13729118	64.0052	103.895	0.698859	5e-05	0.00115716	yes	1.62323
Hex-A	X:9479917-9482434	25.2849	39.3205	0.637004	5e-05	0.00115716	yes	1.5551
HLHm7	3R:21862759-21863741	48.463	145.564	1.5867	5e-05	0.00115716	yes	3.00361
HLHmdelta	3R:21823342-21824358	9.63347	20.5746	1.09474	0.0013	0.0198643	yes	2.13574
HLHmgamma	3R:21825579-21826421	17.456	46.6951	1.41955	0.0002	0.00398402	yes	2.67502
HmgZ	2R:17585055-17591993	111.878	178.263	0.67208	5e-05	0.00115716	yes	1.59337
Hr46	2R:6092958-6124853	50.3559	77.1759	0.615989	5e-05	0.00115716	yes	1.53261
Hsp67Bc	3L:9364610-9365583	53.6445	129.878	1.27565	5e-05	0.00115716	yes	2.42109
Idgf4	X:9822298-9825012	73.0625	172.49	1.23931	5e-05	0.00115716	yes	2.36086
ImpE3	3R:3839545-3856505	49.8736	173.613	1.79952	5e-05	0.00115716	yes	3.48106
Inos	2R:3342418-3346368	45.4034	78.3102	0.786399	0.00015	0.00313849	yes	1.72477
Jheh2	2R:14743271-14745443	52.2875	120.257	1.20158	5e-05	0.00115716	yes	2.29992
knk	3R:5948086-5951383	17.3057	47.0732	1.44366	5e-05	0.00115716	yes	2.7201
l(2)08717	2R:14684768-14691232	14.5949	24.1761	0.728112	0.00115	0.0177903	yes	1.65648
LKR	2L:7791405-7795958	3.60435	7.65421	1.08651	0.0008	0.0130224	yes	2.1236
m4	3R:21849547-21850280	22.4533	124.163	2.46723	5e-05	0.00115716	yes	5.52983
malpha	3R:21836614-21837290	99.089	523.068	2.4002	5e-05	0.00115716	yes	5.27877
miple	3L:267763-270340	5.20338	30.0611	2.53038	5e-05	0.00115716	yes	5.77723
Msp-300	2L:5100876-5205690	5.40388	11.8048	1.12731	5e-05	0.00115716	yes	2.1845
norpA	X:4216658-4256487	6.16121	10.9504	0.829697	5e-05	0.00115716	yes	1.77731
Nplp1	2R:20919902-20927520	5.12774	12.2472	1.25606	5e-05	0.00115716	yes	2.38842
Oatp74D	3L:17480222-17504793	22.3416	73.3232	1.71453	5e-05	0.00115716	yes	3.28191
Obp56d	2R:15590634-15591300	11.1249	39.1361	1.8147	0.0032	0.0414243	yes	3.51788
Ocho	3L:14967947-14969140	11.2168	29.8793	1.41349	5e-05	0.00115716	yes	2.6638
pain	2R:20809027-20815794	17.6262	34.3831	0.963983	5e-05	0.00115716	yes	1.95068
Pde1c	2L:11814825-11928570	3.15828	11.1257	1.81669	5e-05	0.00115716	yes	3.52271
Pfk	2R:5997244-6004696	42.4599	68.9443	0.69933	5e-05	0.00115716	yes	1.62375
Pgk	2L:2745101-2748522	253.688	413.618	0.705244	5e-05	0.00115716	yes	1.63042
Pglym78	3R:24973969-24977512	166.529	290.863	0.804566	5e-05	0.00115716	yes	1.74662
Pgm	3L:16119154-16121696	15.7309	33.3527	1.0842	5e-05	0.00115716	yes	2.1202
PGRP-SB2	3L:16719640-16720388	75.7724	778.922	3.36173	5e-05	0.00115716	yes	10.2798
ple	3L:6706454-6712624	5.07586	21.0384	2.0513	5e-05	0.00115716	yes	4.1448
pncr002:3R	3R:2525273-2525886	12.8902	516.87	5.32546	5e-05	0.00115716	yes	40.0979
Pu	2R:17062821-17070121	2.67614	5.62964	1.07289	0.00355	0.0445665	yes	2.10364
rgn	3L:21375623-21426267	11.7025	23.9467	1.033	5e-05	0.00115716	yes	2.04629
RhoGAP5A	X:5510602-5512834	5.50251	34.5924	2.65229	5e-05	0.00115716	yes	6.28666
rpk	3R:471652-474606	1.22234	7.01608	2.52102	5e-05	0.00115716	yes	5.73988
Sb	3R:11954450-11971006	12.4784	31.1507	1.31984	5e-05	0.00115716	yes	2.49637
sca	2R:8668048-8689515	27.07	45.519	0.749773	5e-05	0.00115716	yes	1.68153
Sema-5c	3L:12060610-12074927	22.7582	36.1462	0.667458	5e-05	0.00115716	yes	1.58827
serp	3L:19694076-19701109	114.293	188.274	0.720099	5e-05	0.00115716	yes	1.64729
Sgs7	3L:11502960-11503347	10.0186	218.143	4.44451	5e-05	0.00115716	yes	21.7738
Sgs8	3L:11502066-11502494	8.4179	165.379	4.29617	0.0001	0.00220328	yes	19.6461
sm	2R:15417413-15519007	30.6005	55.2083	0.851331	5e-05	0.00115716	yes	1.80416
SoxN	2L:8825624-8829670	2.25852	7.18737	1.67008	5e-05	0.00115716	yes	3.18234
spirit	X:8465131-8467614	56.1633	95.1377	0.76039	5e-05	0.00115716	yes	1.69395
TepIV	2L:19549792-19556455	13.4661	21.1935	0.654286	0.0002	0.00398402	yes	1.57384
tinc	3R:13637265-13698229	19.5459	30.1236	0.624027	5e-05	0.00115716	yes	1.54117
Tis11	X:12553394-12573736	23.0154	45.7527	0.991257	5e-05	0.00115716	yes	1.98792
Tom	3L:14962446-14963417	164.472	347.592	1.07955	5e-05	0.00115716	yes	2.11338
Tpi	3R:25958697-25960321	439.826	785.57	0.836807	5e-05	0.00115716	yes	1.78609
TwdlE	2L:7857956-7860838	22.3541	81.765	1.87095	5e-05	0.00115716	yes	3.65772
Ugt86Di	3R:6977628-6979571	9.77756	26.3595	1.43077	5e-05	0.00115716	yes	2.69592
verm	3L:19683132-19688356	276.193	839.908	1.60456	5e-05	0.00115716	yes	3.04102
wmd	2R:19431563-19435603	40.0872	68.7588	0.778401	5e-05	0.00115716	yes	1.71523
yellow-e2	3R:9230830-9232689	1.68927	6.16042	1.86663	0.00085	0.0137338	yes	3.64679
Appl	X:425651-472172	1.24139	2.78909	1.16783	0.00065	0.0110336	no	2.24675
beat-IIa	3R:13145720-13191839	1.21265	3.27911	1.43514	0.00085	0.0137338	no	2.70409
Blimp-1	3L:5624082-5642049	63.5467	90.0755	0.503318	0.00025	0.00480452	no	1.41747
Ccp84Ag	3R:2512449-2513761	0	0.902542	Inf	5e-05	0.00115716	no	Inf
cer	2R:15283719-15284279	90.1144	127.627	0.502103	0.00395	0.048609	no	1.41628
CG10990	X:13639609-13649421	102.168	140.037	0.454865	0.0021	0.0291296	no	1.37065
CG11360	4:701244-706796	34.7765	47.3026	0.443807	0.00345	0.0437518	no	1.36019
CG12063	3R:27324960-27332716	177.345	253.157	0.513475	5e-05	0.00115716	no	1.42748
CG1342	3R:26516365-26518490	340.969	461.566	0.436899	0.0019	0.0266519	no	1.35369
CG1443	3R:24818698-24846128	0.476677	2.91611	2.61296	0.00015	0.00313849	no	6.11758
CG14478	2R:13345185-13353085	41.7211	56.5249	0.438109	0.00185	0.0261609	no	1.35483
CG14741	3R:7894963-7903198	1.31921	2.90283	1.13778	0.00185	0.0261609	no	2.20043
CG14852	3R:10391667-10392192	0	2.083	Inf	0.0007	0.0116778	no	Inf
CG1600	2R:3413622-3420487	71.7058	104.625	0.545066	0.00035	0.00648355	no	1.45909
CG1607	3R:27207831-27219249	94.2973	126.809	0.427371	0.00145	0.0218502	no	1.34478
CG1698	2R:5653866-5694370	0.357701	2.32433	2.69999	0.00025	0.00480452	no	6.49797
CG17754	X:9144459-9149853	89.5993	133.277	0.572863	0.00035	0.00648355	no	1.48748
CG30104	2R:13372501-13380680	0.357188	2.11288	2.56445	0.0019	0.0266519	no	5.91532
CG30410	2R:19241997-19243715	110.976	164.766	0.570176	0.00145	0.0218502	no	1.4847
CG31075	3R:22804265-22814237	202.133	276.049	0.449618	0.0012	0.0184331	no	1.36568
CG31140	3R:19788901-19808950	0.596041	1.8695	1.64917	0.002	0.0279647	no	3.13653
CG31472	3R:3636284-3638731	38.7872	55.1652	0.508181	0.0027	0.0357473	no	1.42225
CG32017	4:1158453-1167149	0.400713	1.74767	2.12479	0.00015	0.00313849	no	4.3614
CG33960	2R:12274052-12318273	45.3976	63.2862	0.479273	0.00075	0.0123234	no	1.39404
CG33978	4:179843-196605	12.2155	16.4211	0.426845	0.00165	0.0239538	no	1.34428
CG34371	2R:19050534-19091494	16.9915	24.3133	0.51693	0.0005	0.00879536	no	1.43091
CG3823	X:6198022-6200778	87.8514	119.55	0.444477	0.0039	0.0483345	no	1.36082
CG42527	X:1891619-1898128	41.1889	57	0.468708	0.0007	0.0116778	no	1.38387
CG5065	2R:12495174-12511214	35.0279	50.2417	0.520381	0.00045	0.00801275	no	1.43433
CG6180	2L:12707660-12708680	177.172	258.045	0.542475	0.0002	0.00398402	no	1.45647
CG6287	2L:11151505-11155716	287.789	385.057	0.420057	0.0025	0.0336613	no	1.33798
CG6770	2L:12045345-12046100	698.02	953.546	0.450035	0.00175	0.0251131	no	1.36607
CG8026	2R:5074174-5079600	25.6326	37.5555	0.551046	0.0019	0.0266519	no	1.46515
CG9628	3L:14615909-14625173	128.899	175.323	0.443783	0.00335	0.0427947	no	1.36016
CG9705	3L:16773200-16775519	103.344	140.459	0.442697	0.00165	0.0239538	no	1.35914
CG9894	2L:2752798-2756606	563.843	745.861	0.403614	0.0026	0.0348464	no	1.32282
Cpr49Ac	2R:8274471-8277562	201.555	298.847	0.568234	0.0001	0.00220328	no	1.48271
ct	X:7503180-7570056	3.08451	4.90843	0.67022	0.00045	0.00801275	no	1.59132
Dh31-R1	2R:9155301-9183429	1.20025	3.6028	1.58578	0.002	0.0279647	no	3.00171
dpr19	2L:10376491-10379908	0.24746	1.06814	2.10984	0.0021	0.0291296	no	4.31641
dUTPase	2L:11011331-11012138	273.73	373.184	0.447136	0.0035	0.0441932	no	1.36333
E23	2L:3334870-3355000	13.442	19.2692	0.519544	0.004	0.0489481	no	1.43351
Edg84A	3R:2510171-2510855	0	1.79116	Inf	5e-05	0.00115716	no	Inf
Fkbp13	2R:17374669-17385431	326.868	438.658	0.424386	0.00165	0.0239538	no	1.342
geminin	2R:2542967-2543955	83.4043	116.089	0.477033	0.00335	0.0427947	no	1.39188
grn	3R:3973071-4007164	17.0464	24.3782	0.516126	0.00025	0.00480452	no	1.43011
hang	X:16316876-16331531	38.4787	53.8723	0.485484	0.00055	0.00954026	no	1.40006
His2Av	3R:22692652-22694630	521.908	730.574	0.485233	0.00025	0.00480452	no	1.39981
HmgD	2R:17600835-17604230	532.684	780.533	0.551179	0.00015	0.00313849	no	1.46528
Hsp23	3L:9374983-9375867	2785.49	3806.55	0.450554	0.00245	0.0330902	no	1.36656
Hsp26	3L:9369517-9370527	660.637	926.087	0.48729	0.0002	0.00398402	no	1.40181
Hsp27	3L:9377164-9378384	1607.28	2257.47	0.490087	0.0021	0.0291296	no	1.40453
Hsp67Ba	3L:9370901-9372634	373.742	509.356	0.446633	0.00105	0.016418	no	1.36285
janA	3R:25863701-25865259	117.057	160.496	0.455323	0.0039	0.0483345	no	1.37109
LpR2	3R:21524487-21566187	16.069	23.5511	0.551513	0.00015	0.00313849	no	1.46562
LSm7	2L:16738851-16743089	75.4081	109.121	0.533142	0.00225	0.0308667	no	1.44707
m	X:11648305-11663548	34.8001	46.667	0.423312	0.0019	0.0266519	no	1.341
Mnn1	2L:7056305-7063406	12.3095	17.8882	0.539241	0.0022	0.030276	no	1.4532
mthl5	3R:7708516-7719019	46.112	67.9231	0.558759	0.00325	0.0419471	no	1.473
MYPT-75D	3L:18619060-18660277	8.69586	12.6279	0.53822	0.00165	0.0239538	no	1.45217
obst-A	X:20110933-20114254	68.2066	98.4959	0.530152	0.0002	0.00398402	no	1.44408
Oscillin	2L:5547202-5549614	67.8834	99.3153	0.548957	0.00075	0.0123234	no	1.46303
Pgi	2R:4798406-4801631	56.438	83.0023	0.556485	0.0001	0.00220328	no	1.47068
Ptr	2R:2069479-2083512	0.699348	2.63992	1.91641	0.00025	0.00480452	no	3.77483
Pvf2	2L:7069577-7084634	10.6231	15.9068	0.582431	0.0027	0.0357473	no	1.49738
PyK	3R:18193233-18198464	225.897	299.082	0.404874	0.00325	0.0419471	no	1.32398
Reg-5	2R:20675525-20680929	126.742	175.867	0.472588	0.0015	0.0224101	no	1.3876
salr	2L:11365304-11373397	0.736315	2.11641	1.52322	0.0037	0.04625	no	2.87433
Sema-1a	2L:8542008-8671276	2.40151	3.80599	0.664332	0.00045	0.00801275	no	1.58483
SK	X:5234270-5295156	0.0433094	0.912422	4.39695	5e-05	0.00115716	no	21.0675
snRNP69D	3L:12726458-12727708	83.4596	122.377	0.552178	0.00095	0.0151809	no	1.4663
Spn43Aa	2R:3035202-3036757	870.042	1146.93	0.398618	0.00345	0.0437518	no	1.31825
Ssb-c31a	2L:8211346-8211938	67.3419	98.3608	0.546578	0.0038	0.0472967	no	1.46062
Tango13	X:13457856-13484624	12.9747	18.9814	0.548882	0.00095	0.0151809	no	1.46295
Tektin-C	3L:5787495-5789666	0.293699	2.33633	2.99183	0.0014	0.0211698	no	7.95484
Treh	2R:16961529-16975734	33.336	48.0855	0.528522	0.00055	0.00954026	no	1.44245
Tsp	2L:6684844-6709085	55.9695	79.3938	0.504385	0.0007	0.0116778	no	1.41852
Uch-L3	3L:9468818-9470073	66.9476	92.7702	0.47063	0.00245	0.0330902	no	1.38571
unc-13	4:891550-925419	10.8361	15.0171	0.470752	0.00115	0.0177903	no	1.38584
Unc-76	X:1974644-1987129	20.0868	29.0749	0.53353	0.0012	0.0184331	no	1.44746
Wnt2	2R:5381673-5390695	63.3886	85.8933	0.438322	0.00335	0.0427947	no	1.35503
Wnt6	2L:7334800-7352542	27.033	39.5874	0.55032	0.00265	0.0353536	no	1.46441

## Sheet: br-repressed
Table S1: genes significantly differentially regulated between w1118 and br5 leg imaginal discs
Sheet 2: genes significantly down-regulated in w1118 leg imaginal discs
gene	locus	broad5 FPKM	w1118 FPKM	log2.fold_change.	p_value	q_value	Included in bioinformatic analyses (> 1.5 fold-change, > 5 FPKM)	ActualFoldChange
Act57B	2R:16831532-16833945	60.2236	31.128	-0.952116	5e-05	0.00115716	yes	0.516874
Act87E	3R:9251706-9253811	38.4176	15.5215	-1.3075	5e-05	0.00115716	yes	0.404021
Aldh	2L:9387388-9391679	15.1226	1.66554	-3.18265	5e-05	0.00115716	yes	0.110136
Aldh-III	2R:3354383-3364667	52.8694	30.4895	-0.794118	5e-05	0.00115716	yes	0.576695
alpha-Est7	3R:3345284-3349476	8.28868	3.18344	-1.38056	0.0008	0.0130224	yes	0.384071
alphaTub85E	3R:5556937-5558970	19.6701	9.76938	-1.00967	0.0041	0.0498919	yes	0.496661
Atet	2L:4333925-4345776	7.94859	4.07638	-0.963411	0.0002	0.00398402	yes	0.512843
Best1	3R:5987185-5996207	17.6947	10.2459	-0.788276	0.00015	0.00313849	yes	0.579038
bgm	2L:14013747-14020208	26.6986	4.26097	-2.64751	5e-05	0.00115716	yes	0.159595
BM-40-SPARC	3R:22694953-22697738	121.399	74.8125	-0.6984	0.00015	0.00313849	yes	0.616253
bnb	X:18682498-18700217	4863.35	682.134	-2.83382	5e-05	0.00115716	yes	0.14026
btsz	3R:10627511-10679626	65.7135	41.9265	-0.648327	5e-05	0.00115716	yes	0.63802
Cad86C	3R:6652800-6674235	82.6258	37.9794	-1.12137	5e-05	0.00115716	yes	0.459655
Cad87A	3R:7719233-7727915	91.1042	57.8706	-0.654688	5e-05	0.00115716	yes	0.635213
CalpA	2R:15312577-15318068	27.9209	18.4977	-0.593997	0.0001	0.00220328	yes	0.662504
CAP	2R:6154216-6194529	8.85032	3.19301	-1.47081	5e-05	0.00115716	yes	0.360779
cdi	3R:14870603-14920076	19.3854	11.2307	-0.787521	5e-05	0.00115716	yes	0.579338
CG10005	3R:7800877-7802912	123.05	75.0639	-0.713048	5e-05	0.00115716	yes	0.610028
CG10126	3R:8681259-8684939	32.5389	8.33783	-1.96442	5e-05	0.00115716	yes	0.256242
CG10182	3R:19412928-19415537	66.4709	0.256972	-8.01497	0.0001	0.00220328	yes	0.00386593
CG10237	2L:19435843-19441278	8.56851	1.95541	-2.13157	0.00165	0.0239538	yes	0.228209
CG10311	3R:12176626-12182733	20.6451	2.37219	-3.12151	5e-05	0.00115716	yes	0.114903
CG10444	2R:16159155-16162030	6.50982	3.17371	-1.03645	0.00065	0.0110336	yes	0.487527
CG10472	3L:6053045-6056006	10.9164	0.669141	-4.02805	0.00295	0.0385888	yes	0.0612969
CG10527	2R:16957567-16960290	114.507	19.1086	-2.58314	5e-05	0.00115716	yes	0.166877
CG10650	2L:18993616-18995930	11.113	1.81997	-2.61027	0.0005	0.00879536	yes	0.163769
CG10660	3L:12479765-12483188	5.20217	1.31212	-1.98722	0.0033	0.0424668	yes	0.252226
CG10725	3L:13431055-13432109	12.6317	0	#NAME?	5e-05	0.00115716	yes	0
CG10863	3L:3941007-3942461	12.7215	3.39913	-1.90403	0.00135	0.0205205	yes	0.267196
CG10912	2R:13943567-13944564	501.224	3.50607	-7.15946	5e-05	0.00115716	yes	0.00699502
CG11069	3R:20720465-20723335	129.3	74.3663	-0.798006	5e-05	0.00115716	yes	0.575145
CG11347	3L:4406947-4420266	24.2271	9.58808	-1.33731	5e-05	0.00115716	yes	0.395758
CG11395	2R:13024745-13026337	5.32452	1.46918	-1.85764	0.00155	0.0229216	yes	0.275927
CG11498	3R:25977783-25986195	5.12046	0.894807	-2.51663	0.00355	0.0445665	yes	0.174751
CG11550	3R:27503948-27505602	86.8019	55.3222	-0.649869	0.00075	0.0123234	yes	0.637339
CG11905	3L:16921476-16928632	105.891	69.1684	-0.614389	5e-05	0.00115716	yes	0.653204
CG12075	X:8758145-8766168	45.1154	24.1388	-0.902265	5e-05	0.00115716	yes	0.535046
CG12116	X:8359722-8377918	8.34357	3.18029	-1.39151	0.00105	0.016418	yes	0.381167
CG12488	2R:8592678-8640441	20.5109	8.02192	-1.35437	5e-05	0.00115716	yes	0.391105
CG12643	X:10158256-10159290	72.5085	28.1561	-1.3647	5e-05	0.00115716	yes	0.388314
CG1273	3L:4263720-4277782	86.1473	39.3583	-1.13014	5e-05	0.00115716	yes	0.456872
CG12964	2R:11373456-11384712	7.50503	4.42798	-0.76121	0.00355	0.0445665	yes	0.590002
CG13023	3L:16917437-16920534	1689.45	110.283	-3.93727	5e-05	0.00115716	yes	0.0652775
CG13053	3L:16252136-16252560	99.5768	29.2948	-1.76517	0.0027	0.0357473	yes	0.294193
CG13065	3L:16270532-16271283	52.1544	0.643058	-6.3417	0.0033	0.0424668	yes	0.0123299
CG13081	2L:19540692-19541343	227.287	23.5853	-3.26856	5e-05	0.00115716	yes	0.103769
CG13082	2L:19538428-19539910	980.5	282.157	-1.79702	5e-05	0.00115716	yes	0.287768
CG13124	2L:9903378-9908649	10.3574	2.88874	-1.84215	5e-05	0.00115716	yes	0.278906
CG13321	2R:8841060-8842675	43.0265	12.85	-1.74346	5e-05	0.00115716	yes	0.298653
CG13323	2R:8934237-8934793	297.589	2.21622	-7.06908	0.0005	0.00879536	yes	0.00744725
CG13422	2R:16413831-16414331	5.20225	0	#NAME?	5e-05	0.00115716	yes	0
CG13510	2R:18545409-18546718	68.5776	7.88751	-3.1201	0.0008	0.0130224	yes	0.115016
CG13516	2R:18556960-18558127	26.7111	7.90353	-1.75687	5e-05	0.00115716	yes	0.295889
CG13627	3R:20538505-20543145	9.2573	1.75001	-2.40323	5e-05	0.00115716	yes	0.189041
CG13705	3L:4896857-4898470	18.5244	0.525136	-5.14059	0.00075	0.0123234	yes	0.0283483
CG13722	3L:4485408-4488013	22.7555	1.81979	-3.64437	5e-05	0.00115716	yes	0.0799714
CG13894	3L:693087-699143	10.32	1.54904	-2.736	5e-05	0.00115716	yes	0.150101
CG13905	3L:902897-903810	22.2057	0.572421	-5.27771	0.00065	0.0110336	yes	0.0257781
CG13962	2L:19813744-19814536	5.90659	1.51558	-1.96246	0.00335	0.0427947	yes	0.256591
CG14059	3L:17020620-17025180	30.1562	3.93941	-2.93641	0.0027	0.0357473	yes	0.130634
CG14132	3L:11705328-11708382	131.29	23.0035	-2.51282	5e-05	0.00115716	yes	0.175211
CG14301	3R:14454869-14467179	19.5476	6.42607	-1.60498	5e-05	0.00115716	yes	0.32874
CG14351	2L:1555158-1611125	37.0605	21.1712	-0.807781	5e-05	0.00115716	yes	0.571261
CG14441	X:6593878-6611012	29.8733	5.02629	-2.57129	5e-05	0.00115716	yes	0.168254
CG14470	2R:1812361-1818868	39.4334	16.0417	-1.29759	5e-05	0.00115716	yes	0.406805
CG14567	3L:21730704-21731530	75.1263	6.81723	-3.46206	5e-05	0.00115716	yes	0.0907436
CG14598	3R:3265487-3267714	25.7392	14.2381	-0.854216	0.0002	0.00398402	yes	0.553168
CG14608	3R:3050809-3066860	12.9055	3.25217	-1.98851	5e-05	0.00115716	yes	0.251999
CG14629	X:945569-946661	42.6089	23.1363	-0.880995	0.00155	0.0229216	yes	0.542992
CG14915	2L:11071026-11071532	10.318	1.15354	-3.16103	0.0041	0.0498919	yes	0.111799
CG14984	3L:3951189-3952420	553.1	34.5595	-4.00038	5e-05	0.00115716	yes	0.0624833
CG15043	X:18387433-18388197	22.0612	2.18421	-3.33633	5e-05	0.00115716	yes	0.0990069
CG15044	X:18385214-18386029	6.40005	0	#NAME?	5e-05	0.00115716	yes	0
CG15093	2R:14663173-14664481	152.686	11.3817	-3.74578	5e-05	0.00115716	yes	0.0745432
CG1516	2R:5735567-5762577	43.1325	18.0244	-1.25882	5e-05	0.00115716	yes	0.417884
CG15282	2L:14712664-14713266	236.593	29.6141	-2.99805	5e-05	0.00115716	yes	0.125169
CG15347	X:8352526-8354927	8.77291	0.784432	-3.48333	0.00025	0.00480452	yes	0.0894153
CG15365	X:8948730-8962016	10.8349	7.02142	-0.625847	0.0024	0.0325661	yes	0.648037
CG15784	X:5324712-5326494	19.099	9.33283	-1.03311	0.0008	0.0130224	yes	0.488655
CG15786	X:5190113-5201450	18.1858	9.01925	-1.01173	0.0034	0.0433699	yes	0.49595
CG15818	2L:7410933-7412229	34.8573	0.275114	-6.98529	0.00035	0.00648355	yes	0.00789258
CG15822	3L:2153200-2163860	29.4864	19.3618	-0.606839	5e-05	0.00115716	yes	0.656635
CG15917	2R:13023961-13024408	28.3894	6.56311	-2.1129	0.00075	0.0123234	yes	0.231182
CG1648	2R:5698889-5707556	251.319	51.5199	-2.28632	5e-05	0.00115716	yes	0.204998
CG16704	2L:3692137-3692588	67.0445	20.8553	-1.68471	0.00265	0.0353536	yes	0.311067
CG16708	3R:1184584-1194027	14.2985	7.1495	-0.999949	0.0001	0.00220328	yes	0.500017
CG16778	2R:20973302-21027064	7.58541	1.07054	-2.82489	5e-05	0.00115716	yes	0.141131
CG16798	2L:20376982-20382355	16.3368	2.04832	-2.99561	5e-05	0.00115716	yes	0.125381
CG16886	2L:13914724-13955757	10.5008	0.465699	-4.49495	0.00025	0.00480452	yes	0.0443489
CG16926	2R:15385258-15388801	73.6571	19.7099	-1.90191	5e-05	0.00115716	yes	0.26759
CG16959	3L:15109838-15124478	10.6223	3.57314	-1.57183	0.00365	0.0456905	yes	0.336381
CG17108	2L:10692939-10694103	443.436	2.20733	-7.65028	5e-05	0.00115716	yes	0.00497779
CG17124	2L:10744074-10756316	33.524	14.3514	-1.224	5e-05	0.00115716	yes	0.428093
CG17549	2L:19387049-19390070	257.848	80.3508	-1.68214	5e-05	0.00115716	yes	0.311621
CG17646	2L:1732525-1750613	8.90873	3.84316	-1.21293	5e-05	0.00115716	yes	0.431393
CG17843	3R:17739470-17741268	39.6728	2.03475	-4.28522	5e-05	0.00115716	yes	0.0512883
CG1806	X:11901210-11906242	76.936	47.4499	-0.697255	5e-05	0.00115716	yes	0.616745
CG18067	2R:16422014-16422860	58.4238	7.30181	-3.00023	5e-05	0.00115716	yes	0.12498
CG18431	2R:13390232-13396150	2356.33	577.193	-2.02942	5e-05	0.00115716	yes	0.244954
CG18622	3R:12809231-12813660	9.05071	1.52264	-2.57146	0.00015	0.00313849	yes	0.168234
CG18735	2R:17685576-17686671	1560.39	5.25976	-8.21269	5e-05	0.00115716	yes	0.0033708
CG2201	2L:21614762-21623599	17.3379	8.98863	-0.947758	5e-05	0.00115716	yes	0.518438
CG2233	X:7929764-7931533	90.4112	37.3093	-1.27696	5e-05	0.00115716	yes	0.412662
CG2556	X:12391193-12410580	19.6446	11.1948	-0.811304	0.00025	0.00480452	yes	0.569867
CG2781	3R:3807538-3821568	12.957	2.11407	-2.61563	5e-05	0.00115716	yes	0.16316
CG2865	X:2175544-2186779	36.4183	15.8962	-1.19598	5e-05	0.00115716	yes	0.436489
CG2991	2L:2857158-2868553	33.4642	18.0428	-0.891195	5e-05	0.00115716	yes	0.539167
CG30101	2R:13295762-13297705	54.9286	3.58007	-3.9395	5e-05	0.00115716	yes	0.0651768
CG30359	2R:4350277-4352597	22.9681	11.0654	-1.05358	5e-05	0.00115716	yes	0.481773
CG3040	X:6866356-6867443	27.0667	16.8883	-0.680494	0.00315	0.0408984	yes	0.623951
CG31100	3R:4820949-4827608	16.0128	1.56615	-3.35393	5e-05	0.00115716	yes	0.0978061
CG31103	3R:21045068-21047095	5.00034	0.201569	-4.63268	0.00045	0.00801275	yes	0.0403111
CG31121	3R:20702789-20720327	81.815	39.7701	-1.04068	5e-05	0.00115716	yes	0.486098
CG31145	3R:19431472-19495378	7.93491	1.6963	-2.22582	5e-05	0.00115716	yes	0.213777
CG31176	3R:17498017-17545380	7.60312	3.22439	-1.23756	0.0001	0.00220328	yes	0.424088
CG31445	3R:25066301-25070220	8.46428	4.67559	-0.85624	0.0015	0.0224101	yes	0.552391
CG31676	2L:20840799-20849182	13.0589	3.65595	-1.83671	0.00155	0.0229216	yes	0.279958
CG32043	3L:9454176-9465697	22.2987	11.1516	-0.999706	5e-05	0.00115716	yes	0.500101
CG32048	3L:9540319-9588339	113.329	75.3415	-0.589002	5e-05	0.00115716	yes	0.664803
CG32082	3L:11129148-11156742	44.1069	17.7248	-1.31523	5e-05	0.00115716	yes	0.40186
CG32137	3L:13932351-13955749	13.7225	8.6501	-0.665757	0.00065	0.0110336	yes	0.630359
CG32159	3L:16412893-16516025	44.4729	8.43896	-2.39779	5e-05	0.00115716	yes	0.189755
CG32365	3L:7862143-7887914	15.7123	7.22172	-1.12148	5e-05	0.00115716	yes	0.459622
CG32372	3L:7512587-7521116	12.5298	7.91557	-0.662597	0.00035	0.00648355	yes	0.63174
CG3244	2L:4796583-4801923	17.9119	3.18662	-2.49082	5e-05	0.00115716	yes	0.177905
CG32549	X:18284520-18304168	27.3768	17.8239	-0.619147	0.00285	0.0374492	yes	0.651059
CG32556	X:17566482-17592559	61.1058	34.4936	-0.824978	5e-05	0.00115716	yes	0.56449
CG32789	X:3693180-3695607	57.1129	32.504	-0.813196	5e-05	0.00115716	yes	0.569118
CG32793	X:2823828-2826575	30.3466	0.766664	-5.3068	5e-05	0.00115716	yes	0.0252636
CG33232	3L:2466902-2503584	31.8966	20.2033	-0.658809	0.00105	0.016418	yes	0.6334
CG33346	3R:24494954-24496174	62.0668	0.768459	-6.33571	0.00035	0.00648355	yes	0.0123812
CG33509	2L:21084604-21086506	8.14688	2.87488	-1.50275	0.00025	0.00480452	yes	0.352881
CG33926	3L:9436363-9439480	10.1506	0.574067	-4.1442	0.0004	0.00727083	yes	0.056555
CG33967	3R:10524251-10549978	34.4338	17.7157	-0.958802	5e-05	0.00115716	yes	0.514486
CG3397	3R:7808819-7810263	33.8277	5.79625	-2.54501	5e-05	0.00115716	yes	0.171346
CG33970	3R:22144079-22187711	27.421	3.75405	-2.86876	5e-05	0.00115716	yes	0.136904
CG34253	3L:18079490-18080416	6.81434	2.52247	-1.43374	0.00315	0.0408984	yes	0.370171
CG34349	3R:20882811-20890070	14.7232	9.43365	-0.642207	0.00015	0.00313849	yes	0.640734
CG34355	3R:19646335-19675071	32.0508	10.2709	-1.6418	5e-05	0.00115716	yes	0.320457
CG34380	2L:6179513-6209477	38.2503	25.482	-0.585996	0.0002	0.00398402	yes	0.666191
CG34382	3L:9872084-9881781	14.4164	3.3249	-2.11633	0.00035	0.00648355	yes	0.230633
CG34398	2L:8898803-8933382	65.5506	27.7198	-1.24169	5e-05	0.00115716	yes	0.422876
CG34445	2R:18535396-18535978	41.4185	9.53869	-2.11841	0.0002	0.00398402	yes	0.2303
CG3505	3R:10483192-10484950	14.0968	3.74143	-1.9137	0.00075	0.0123234	yes	0.26541
CG3625	2L:283384-291010	65.2935	41.6322	-0.649239	5e-05	0.00115716	yes	0.637616
CG3649	2R:18733523-18741220	50.9281	15.7218	-1.6957	5e-05	0.00115716	yes	0.308706
CG3699	X:840685-841517	30.2221	2.1359	-3.82269	0.00015	0.00313849	yes	0.0706734
CG3726	X:5811209-5835703	7.61792	3.08795	-1.30275	5e-05	0.00115716	yes	0.405353
CG3829	2R:20873477-20878012	5.73386	2.42079	-1.24403	0.0002	0.00398402	yes	0.422192
CG3880	2R:20648285-20650069	79.15	51.1954	-0.628576	0.0004	0.00727083	yes	0.646815
CG3940	3R:5938267-5945142	15.9464	5.61786	-1.50514	5e-05	0.00115716	yes	0.352296
CG42268	3L:9727111-9753495	13.0622	7.22965	-0.853396	5e-05	0.00115716	yes	0.553479
CG42345	2R:1301240-1342518	16.1728	9.36448	-0.788298	5e-05	0.00115716	yes	0.579027
CG42351	2R:14642499-14648577	15.9734	5.74315	-1.47576	0.00035	0.00648355	yes	0.359545
CG42457	3R:13757594-13841501	8.83332	2.93598	-1.58911	5e-05	0.00115716	yes	0.332376
CG4386	2R:17686834-17688405	187.547	13.9243	-3.75157	5e-05	0.00115716	yes	0.0742443
CG4484	3L:9196164-9201953	8.08605	0.845905	-3.25687	5e-05	0.00115716	yes	0.104613
CG4562	3R:15692861-15700941	15.2828	5.44711	-1.48835	5e-05	0.00115716	yes	0.356421
CG4576	3R:11629973-11658354	37.5177	2.84336	-3.7219	5e-05	0.00115716	yes	0.0757872
CG4666	X:5970099-5971515	23.6021	4.30473	-2.45492	5e-05	0.00115716	yes	0.182388
CG4678	X:16590164-16605178	8.06327	1.72352	-2.226	0.0003	0.00572757	yes	0.21375
CG4702	3R:7947298-7953919	24.5755	4.06372	-2.59635	5e-05	0.00115716	yes	0.165357
CG4797	2R:19699703-19705849	18.6882	10.6976	-0.804846	0.001	0.0158348	yes	0.572425
CG4822	2L:117078-121974	33.5481	2.53272	-3.72748	5e-05	0.00115716	yes	0.0754952
CG5080	2L:1160289-1163882	20.7198	2.82343	-2.87549	5e-05	0.00115716	yes	0.136267
CG5254	X:650220-652752	19.6622	4.18854	-2.23091	0.00025	0.00480452	yes	0.213025
CG5322	2L:10452676-10456044	5.04102	1.91502	-1.39636	0.0002	0.00398402	yes	0.379887
CG5399	3R:11520991-11522286	80.107	20.8806	-1.93976	5e-05	0.00115716	yes	0.260659
CG5493	2R:14502586-14505823	17.3322	2.45314	-2.82076	0.00235	0.0320371	yes	0.141537
CG5535	3L:17845723-17849864	40.7802	19.7216	-1.04809	5e-05	0.00115716	yes	0.483607
CG5697	3R:16841670-16842842	48.8067	22.854	-1.09463	5e-05	0.00115716	yes	0.468255
CG5888	2L:16400168-16450500	37.2838	14.9017	-1.32307	5e-05	0.00115716	yes	0.399683
CG5958	2L:7430528-7433480	46.3487	15.6139	-1.5697	5e-05	0.00115716	yes	0.336879
CG5966	X:5882844-5886677	16.4416	3.69721	-2.15284	5e-05	0.00115716	yes	0.224869
CG6040	3R:14949721-14957661	43.4983	25.8748	-0.749411	5e-05	0.00115716	yes	0.594846
CG6045	3R:11368473-11373457	43.8989	7.02009	-2.64462	5e-05	0.00115716	yes	0.159915
CG6206	2L:10457655-10462475	75.8109	48.0809	-0.65694	5e-05	0.00115716	yes	0.634221
CG6330	3R:22775844-22784209	31.9873	8.17059	-1.96899	5e-05	0.00115716	yes	0.255432
CG6409	3L:10873793-10875151	21.6852	0.305429	-6.14973	0.00165	0.0239538	yes	0.0140847
CG6414	X:3863030-3865381	77.9068	43.8289	-0.829866	5e-05	0.00115716	yes	0.562581
CG6426	2R:12756896-12759359	381.797	6.58237	-5.85806	5e-05	0.00115716	yes	0.0172405
CG6643	3R:20370440-20382271	15.6523	0.372202	-5.39414	5e-05	0.00115716	yes	0.0237794
CG6701	2R:9860503-9867670	30.3517	20.2181	-0.586128	0.0001	0.00220328	yes	0.666127
CG6739	2L:7608389-7616528	15.4288	4.71703	-1.70968	5e-05	0.00115716	yes	0.305729
CG6749	3L:9724337-9726907	19.3851	7.75931	-1.32095	5e-05	0.00115716	yes	0.400272
CG6836	3L:18943731-18948509	5.04554	0.827236	-2.60864	0.0006	0.0103051	yes	0.163954
CG6947	3L:11969213-11974030	10.3907	0.0997558	-6.70267	0.00405	0.0494213	yes	0.00960049
CG7054	3R:18290634-18291660	82.1746	22.0002	-1.90118	5e-05	0.00115716	yes	0.267725
CG7173	3L:21548468-21551321	54.1817	7.9835	-2.76271	5e-05	0.00115716	yes	0.147347
CG7214	2L:7743676-7744841	202.287	2.5201	-6.32678	5e-05	0.00115716	yes	0.012458
CG7267	X:8965480-8972528	740.883	491.09	-0.593258	5e-05	0.00115716	yes	0.662844
CG7356	2L:8011406-8026901	11.8726	1.09972	-3.43242	5e-05	0.00115716	yes	0.0926267
CG7465	3L:4480281-4481487	101.73	0.594341	-7.41925	0.0016	0.0235413	yes	0.00584234
CG7470	3L:21965100-21975893	7.00321	1.58391	-2.14453	0.00055	0.00954026	yes	0.226169
CG7567	3R:25412957-25413822	85.1536	0.753627	-6.82007	0.00395	0.048609	yes	0.00885021
CG8177	3L:9756651-9779365	6.83591	2.97549	-1.2	5e-05	0.00115716	yes	0.435273
CG8303	2R:12482532-12492716	20.2694	4.17218	-2.28043	5e-05	0.00115716	yes	0.205836
CG8317	2R:12462082-12464087	26.8034	7.60109	-1.81813	0.0002	0.00398402	yes	0.283587
CG8547	2R:10148710-10155419	20.3164	5.48173	-1.88994	5e-05	0.00115716	yes	0.269818
CG8664	X:17175809-17176744	8.68398	0	#NAME?	5e-05	0.00115716	yes	0
CG8788	2R:5025978-5029486	51.4768	16.3653	-1.65329	5e-05	0.00115716	yes	0.317916
CG9171	2L:5768249-5800204	23.7228	15.7191	-0.593757	0.00035	0.00648355	yes	0.662616
CG9336	2L:20859168-20861017	129.968	33.2877	-1.96509	5e-05	0.00115716	yes	0.256122
CG9455	2R:2769169-2772378	6.83233	0.754222	-3.17932	0.00015	0.00313849	yes	0.11039
CG9460	2R:2773909-2775767	83.2856	16.7588	-2.31315	5e-05	0.00115716	yes	0.201221
CG9503	X:14733410-14827616	32.8995	18.2006	-0.854079	0.0001	0.00220328	yes	0.553218
CG9510	2L:8939779-8943264	6.38416	1.55295	-2.03949	0.0011	0.0171691	yes	0.24325
CG9663	2L:3294925-3303129	10.6787	6.10272	-0.807205	0.00045	0.00801275	yes	0.571485
CG9674	3L:16780914-16800828	47.3744	21.4284	-1.14458	5e-05	0.00115716	yes	0.45232
CG9689	X:9776015-9776992	211.197	111.164	-0.925909	5e-05	0.00115716	yes	0.526352
CG9796	3R:9223556-9227580	861.021	570.609	-0.593546	5e-05	0.00115716	yes	0.662712
CG9812	2R:19299858-19307207	141.942	59.825	-1.24648	5e-05	0.00115716	yes	0.421475
CG9850	2R:19641217-19685240	5.25331	1.85138	-1.50463	0.0022	0.030276	yes	0.352422
CG9989	3R:24496457-24497743	10.4662	4.69071	-1.15786	0.0013	0.0198643	yes	0.448177
chinmo	2L:1651259-1698617	14.2766	0.401943	-5.15052	5e-05	0.00115716	yes	0.028154
Cht3	2L:22892289-22918647	578.511	240.45	-1.26661	5e-05	0.00115716	yes	0.415636
Cht7	3L:3090984-3106956	23.367	5.04706	-2.21096	5e-05	0.00115716	yes	0.215991
Cpr47Ea	2R:7137872-7140903	7.42855	0	#NAME?	5e-05	0.00115716	yes	0
Cpr47Eb	2R:7142673-7143488	71.0491	0.808574	-6.45729	0.0007	0.0116778	yes	0.0113805
Cpr49Ae	2R:8289719-8292620	20.785	0.176434	-6.88027	0.00315	0.0408984	yes	0.00848853
Cpr49Ah	2R:8301466-8302675	20.1454	4.02312	-2.32406	0.00025	0.00480452	yes	0.199704
Cpr64Aa	3L:4207837-4209178	245.882	1.69781	-7.17815	5e-05	0.00115716	yes	0.00690498
Cpr65Ec	3L:7086308-7086943	120.76	45.3082	-1.4143	5e-05	0.00115716	yes	0.375192
Cpr72Ea	3L:16355702-16356780	563.662	1.57767	-8.48089	5e-05	0.00115716	yes	0.00279896
Cpr72Eb	3L:16358096-16358750	16.9123	2.44179	-2.79207	0.00025	0.00480452	yes	0.14438
Cpr92F	3R:16495292-16498538	18.0319	4.11479	-2.13166	5e-05	0.00115716	yes	0.228195
Cpr97Ea	3R:22908853-22912341	50.6123	0.749286	-6.07783	5e-05	0.00115716	yes	0.0148044
CREG	3R:13218993-13220362	154.504	71.3216	-1.11523	5e-05	0.00115716	yes	0.461617
CRMP	3R:1396829-1404913	26.9989	13.0155	-1.05267	5e-05	0.00115716	yes	0.482075
cv-2	2R:17242519-17266967	14.8951	9.51269	-0.646912	0.0002	0.00398402	yes	0.638646
Cyp309a1	2L:2562884-2564848	9.45988	3.87643	-1.28709	0.0025	0.0336613	yes	0.409776
Cyp4e1	2R:4334973-4339404	16.2526	1.85692	-3.12969	5e-05	0.00115716	yes	0.114254
Cyp6a13	2R:4458006-4459650	24.1162	3.80598	-2.66366	5e-05	0.00115716	yes	0.157818
Cyp6a23	2R:10763337-10765159	17.1269	0.67047	-4.67495	5e-05	0.00115716	yes	0.0391472
Cyp9b2	2R:3017781-3019640	69.5668	5.66899	-3.61723	5e-05	0.00115716	yes	0.0814899
Cyp9c1	2R:20502943-20526110	46.3568	20.7265	-1.1613	5e-05	0.00115716	yes	0.447108
dro2	3L:3314348-3314682	1626.16	10.5319	-7.27056	5e-05	0.00115716	yes	0.00647655
Drs	3L:3369568-3369942	299.434	24.561	-3.60779	5e-05	0.00115716	yes	0.0820248
dys	3R:21902313-21924433	13.6624	7.59338	-0.847393	5e-05	0.00115716	yes	0.555787
ea	3R:11154451-11156135	33.2128	17.1937	-0.949865	0.00015	0.00313849	yes	0.517683
ect	3L:10183375-10194934	11.842	5.40478	-1.1316	0.0007	0.0116778	yes	0.456408
emp	2R:20864126-20872321	108.039	60.0809	-0.846574	5e-05	0.00115716	yes	0.556104
Ets98B	3R:23562261-23574089	7.43158	3.77344	-0.977786	0.00045	0.00801275	yes	0.507757
Fbp1	3L:14087685-14091156	1993.75	663.885	-1.58648	0.0001	0.00220328	yes	0.332983
Fbp2	2L:9426859-9427835	491.314	225.137	-1.12585	5e-05	0.00115716	yes	0.458234
Fhos	3L:8747242-8791819	9.38148	4.49804	-1.06052	5e-05	0.00115716	yes	0.47946
fru	3R:14242314-14371308	16.2972	3.09763	-2.39539	5e-05	0.00115716	yes	0.190071
Gdh	3R:19759636-19768824	385.584	256.928	-0.585679	0.00015	0.00313849	yes	0.666335
glec	3R:17676626-17681984	74.866	39.8401	-0.910088	5e-05	0.00115716	yes	0.532152
Glycogenin	2R:17087978-17102485	66.4847	42.5081	-0.645284	0.0001	0.00220328	yes	0.639367
Gs1	2L:132059-134472	47.8785	31.441	-0.60673	0.0028	0.0369592	yes	0.656683
GstD3	3R:8198789-8199535	295.307	95.3013	-1.63165	5e-05	0.00115716	yes	0.322719
GstE3	2R:14288221-14288972	30.6054	2.73129	-3.48613	5e-05	0.00115716	yes	0.0892421
GstE6	2R:14293517-14294266	14.2689	3.07011	-2.21651	0.0015	0.0224101	yes	0.215161
gukh	3R:14809746-14848160	60.9971	37.6635	-0.695572	5e-05	0.00115716	yes	0.617464
Hn	3L:7753576-7756268	7.14472	2.41781	-1.56318	0.00245	0.0330902	yes	0.338405
Idgf3	2L:16450906-16453176	12.8448	3.83807	-1.74273	5e-05	0.00115716	yes	0.298803
if	X:16646221-16677467	5.8812	3.60215	-0.707252	0.00075	0.0123234	yes	0.612486
Ih	2R:10166937-10186413	5.83559	0.947448	-2.62276	0.0001	0.00220328	yes	0.162357
ImpL1	3L:13375856-13377099	389.43	172.431	-1.17535	5e-05	0.00115716	yes	0.442778
ImpL2	3L:4224698-4236147	166.627	78.6	-1.08402	5e-05	0.00115716	yes	0.471712
Irc	3R:12828598-12832930	7.2909	1.9496	-1.90292	0.0002	0.00398402	yes	0.267402
Jheh3	2R:14747879-14749576	6.94657	1.29671	-2.42145	0.001	0.0158348	yes	0.186669
Jon65Aiii	3L:6043873-6044800	249.216	1.20864	-7.68786	0.00125	0.0191674	yes	0.00484977
Jon65Aiv	3L:6032256-6033248	733.949	3.8431	-7.57727	5e-05	0.00115716	yes	0.00523619
ken	2R:19757797-19764965	6.58033	3.50864	-0.907249	0.0029	0.0379917	yes	0.533201
kkv	3R:1203814-1218587	131.608	71.037	-0.88961	5e-05	0.00115716	yes	0.539762
L	2R:10368707-10384817	41.257	27.0818	-0.607312	0.0002	0.00398402	yes	0.656417
l(1)G0232	X:9522754-9552947	58.8059	37.4554	-0.650788	5e-05	0.00115716	yes	0.636933
l(2)35Bg	2L:15035470-15038857	99.7977	44.3702	-1.16942	5e-05	0.00115716	yes	0.444601
lama	3L:5336714-5349023	43.6568	25.9887	-0.748321	5e-05	0.00115716	yes	0.595296
LamC	2R:10414075-10472826	28.557	10.6559	-1.42219	0.0004	0.00727083	yes	0.373145
Lsp1alpha	X:12384415-12386933	11.2699	2.96298	-1.92735	5e-05	0.00115716	yes	0.262911
Lsp1beta	2L:898646-901320	72.7273	19.9924	-1.86305	5e-05	0.00115716	yes	0.274895
Lsp1gamma	3L:66438-69003	46.4632	8.71095	-2.41519	5e-05	0.00115716	yes	0.187481
Lsp2	3L:12122492-12124796	414.485	184.025	-1.17142	5e-05	0.00115716	yes	0.443985
M(2)21AB	2L:106902-114433	109.859	73.1889	-0.585958	5e-05	0.00115716	yes	0.666208
Mipp1	3L:16556726-16566430	8.79406	2.9444	-1.57856	0.00255	0.0342288	yes	0.334817
Mmp1	2R:20556900-20575704	55.8471	31.091	-0.844984	5e-05	0.00115716	yes	0.556716
MtnA	3R:5609486-5610093	71.6567	30.9027	-1.21337	0.0038	0.0472967	yes	0.43126
Muc11A	X:11953833-11959180	8.63762	0.259881	-5.05471	5e-05	0.00115716	yes	0.0300871
Mur18B	X:19107288-19108971	13.5518	1.94556	-2.80022	0.00085	0.0137338	yes	0.143565
Mur89F	3R:12979241-12985670	13.1325	3.25491	-2.01245	5e-05	0.00115716	yes	0.247852
mwh	3L:1208424-1232701	32.1251	5.88527	-2.44852	5e-05	0.00115716	yes	0.183198
nahoda	2R:18783695-18804247	33.9452	20.8133	-0.705705	5e-05	0.00115716	yes	0.613144
Ndg	2R:6201422-6209405	11.4687	4.8889	-1.23012	5e-05	0.00115716	yes	0.426282
Nep2	3R:545518-557595	135.391	78.4644	-0.787026	5e-05	0.00115716	yes	0.579539
NetB	X:14581644-14643407	11.5266	5.40196	-1.09341	5e-05	0.00115716	yes	0.468652
nimC3	2L:14013747-14020208	14.1685	3.7519	-1.917	5e-05	0.00115716	yes	0.264806
NLaz	2L:1359982-1361732	45.0503	25.0613	-0.846077	0.0012	0.0184331	yes	0.556296
Nox	2R:12197071-12203725	15.4896	5.0004	-1.63119	5e-05	0.00115716	yes	0.322823
Npc2a	2L:1988291-1988940	151.338	63.9867	-1.24193	5e-05	0.00115716	yes	0.422807
Obp56a	2R:15585227-15586016	32145.8	180.248	-7.4785	5e-05	0.00115716	yes	0.0056072
Obp99a	3R:25497381-25498056	661.578	147.804	-2.16223	5e-05	0.00115716	yes	0.223411
Obp99b	3R:25541972-25542532	2001.19	939.692	-1.0906	5e-05	0.00115716	yes	0.469567
Obp99c	3R:25508223-25512504	157.212	68.4633	-1.19931	5e-05	0.00115716	yes	0.435484
ome	3L:14665967-14740971	15.4384	8.39825	-0.878363	0.004	0.0489481	yes	0.543984
Osi7	3R:2074713-2077405	18.3128	11.296	-0.697047	0.00055	0.00954026	yes	0.616836
osp	2L:14599775-14689325	24.9309	15.9675	-0.642791	5e-05	0.00115716	yes	0.64047
out	X:19205060-19216098	7.5311	3.75183	-1.00527	0.0021	0.0291296	yes	0.498178
Papss	3L:19838396-19854025	106.866	59.6209	-0.841911	5e-05	0.00115716	yes	0.557903
Pepck	2R:14424271-14426924	96.4297	20.391	-2.24154	5e-05	0.00115716	yes	0.21146
Peritrophin-15a	2L:8395660-8396084	185.983	2.6639	-6.12548	0.00395	0.048609	yes	0.0143234
phm	X:18579801-18582257	13.7798	2.12707	-2.69561	0.0002	0.00398402	yes	0.154361
Picot	2R:12542819-12555183	5.29918	0.830315	-2.67404	5e-05	0.00115716	yes	0.156687
pip	3L:19287868-19330699	71.6957	31.2525	-1.19792	5e-05	0.00115716	yes	0.435905
pncr004:X	X:19065109-19068929	16.1369	5.78037	-1.48113	0.001	0.0158348	yes	0.358208
ppk13	2L:21086899-21088730	21.9427	7.55439	-1.53836	5e-05	0.00115716	yes	0.344278
Prat2	3L:6905092-6907958	5.24728	1.0619	-2.30493	0.0004	0.00727083	yes	0.202372
psh	X:18378514-18380954	18.9089	0.335898	-5.8149	0.0001	0.00220328	yes	0.017764
pwn	2R:3182812-3187907	70.9201	31.1283	-1.18797	5e-05	0.00115716	yes	0.438921
raw	2L:8709879-8740660	25.3115	16.5748	-0.610802	0.00035	0.00648355	yes	0.654833
Reg-2	3L:605164-606569	26.808	9.05493	-1.56589	0.00055	0.00954026	yes	0.33777
Rfabg	4:1085537-1096830	18.5131	5.43214	-1.76895	5e-05	0.00115716	yes	0.293421
rg	X:4979865-5145183	19.8497	10.8937	-0.865633	5e-05	0.00115716	yes	0.548809
Rgk1	2R:15199897-15212994	5.94498	1.98619	-1.58167	0.00185	0.0261609	yes	0.334095
Rgl	3L:13899990-13918348	17.7405	9.58954	-0.887511	5e-05	0.00115716	yes	0.540545
Rip11	X:18529674-18541596	66.1535	40.9358	-0.692455	5e-05	0.00115716	yes	0.6188
rpr	3L:18390652-18391503	24.2376	10.3271	-1.23082	0.0001	0.00220328	yes	0.426078
sas	3R:2988550-3009424	145.454	70.706	-1.04065	5e-05	0.00115716	yes	0.486106
scarface	2R:1564253-1579200	46.5137	18.6216	-1.32068	5e-05	0.00115716	yes	0.400347
sda	3R:22741454-22771035	21.0536	8.67453	-1.27921	5e-05	0.00115716	yes	0.412021
sha	2R:7216766-7223482	5.71412	2.43672	-1.22959	5e-05	0.00115716	yes	0.426438
slbo	2R:20219044-20221829	18.2441	0.205858	-6.46964	5e-05	0.00115716	yes	0.0112835
slif	3L:22874145-22886929	5.84969	2.0394	-1.52021	0.00065	0.0110336	yes	0.348634
sls	3L:2040178-2115617	16.9564	10.7431	-0.658424	5e-05	0.00115716	yes	0.633572
SP1029	3R:25070679-25076167	400.526	183.514	-1.126	5e-05	0.00115716	yes	0.458182
SP1173	3L:6682424-6696619	6.34722	2.74617	-1.2087	5e-05	0.00115716	yes	0.432657
SP2637	2R:14528475-14545706	46.5354	26.0902	-0.834819	5e-05	0.00115716	yes	0.560653
SP71	X:72457-96056	316.263	115.978	-1.44727	5e-05	0.00115716	yes	0.366714
spir	2L:20311218-20348386	22.3132	4.10727	-2.44164	5e-05	0.00115716	yes	0.184074
Spn1	2R:2769169-2772378	11.3166	1.38811	-3.02724	0.00215	0.0297286	yes	0.122661
Spn28D	2L:8004547-8007253	28.4407	16.9042	-0.75058	0.00035	0.00648355	yes	0.594367
Spn4	2R:2763408-2766428	94.1532	58.7785	-0.679721	5e-05	0.00115716	yes	0.624286
spz6	2R:20644902-20647989	233.954	103.743	-1.17321	5e-05	0.00115716	yes	0.443433
stv	3L:13470652-13476621	15.0942	9.68841	-0.639661	0.00395	0.048609	yes	0.641863
svp	3R:8084470-8128509	19.2679	12.5806	-0.615006	0.0005	0.00879536	yes	0.652931
Thor	2L:3478433-3479612	163.106	18.4373	-3.14511	5e-05	0.00115716	yes	0.113039
Tie	3L:4510697-4524519	5.19129	0.709204	-2.87182	5e-05	0.00115716	yes	0.136614
toc	2L:3068338-3144613	15.828	7.83965	-1.01362	5e-05	0.00115716	yes	0.495303
tok	3R:20545418-20574855	62.3656	37.3448	-0.739841	5e-05	0.00115716	yes	0.598804
TotA	3R:16696757-16697427	111.557	30.6338	-1.86458	5e-05	0.00115716	yes	0.274602
Tsf1	X:18281964-18284377	199.508	14.4609	-3.78621	5e-05	0.00115716	yes	0.0724828
Tsp29Fa	2L:8933963-8936096	6.00687	0.742022	-3.01708	0.0006	0.0103051	yes	0.123529
Tsp29Fb	2L:8937389-8939746	19.7766	4.46212	-2.14799	0.00075	0.0123234	yes	0.225626
Tsp42Ed	2R:2897364-2899359	8.10526	1.95223	-2.05374	0.0023	0.0315031	yes	0.24086
Tsp42Ef	2R:2912516-2915587	103.701	55.6377	-0.898299	5e-05	0.00115716	yes	0.53652
Tsp42El	2R:2933277-2936050	18.4856	8.65612	-1.09461	0.00135	0.0205205	yes	0.468263
TwdlV	3R:80501-81316	185.596	1.89155	-6.61645	5e-05	0.00115716	yes	0.0101918
Ubi-p5E	X:6171009-6173304	204.956	68.5502	-1.58008	5e-05	0.00115716	yes	0.334463
uzip	2R:20899572-20917609	24.1303	14.5778	-0.727075	5e-05	0.00115716	yes	0.604128
vir-1	2L:12403269-12423421	130.6	63.1174	-1.04904	5e-05	0.00115716	yes	0.483288
W	3L:18160841-18178737	30.89	19.206	-0.685582	5e-05	0.00115716	yes	0.621755
wun2	2R:5301848-5305353	65.7582	19.2463	-1.77259	5e-05	0.00115716	yes	0.292683
yellow-c	2L:15035470-15038857	39.6647	3.60823	-3.45849	0.0001	0.00220328	yes	0.0909683
zormin	3L:2117465-2150089	19.7105	12.4352	-0.664533	5e-05	0.00115716	yes	0.630892
Ag5r2	X:14676984-14678075	4.16785	0	#NAME?	5e-05	0.00115716	no	0
amd	2L:19110158-19114110	2.83179	0.269858	-3.39144	0.0018	0.0256618	no	0.0952959
ana	2R:4956605-4965059	30.4714	20.5274	-0.569906	0.0005	0.00879536	no	0.673661
B4	2L:13502655-13549323	20.7586	15.5567	-0.416179	0.00365	0.0456905	no	0.74941
bbg	3L:14405920-14506348	70.4037	49.9838	-0.494192	0.00175	0.0251131	no	0.70996
beta-Spec	X:17551453-17565921	176.446	131.332	-0.42601	0.0017	0.0245978	no	0.744318
bou	X:6880522-6881236	258.183	182.697	-0.498942	0.0009	0.014488	no	0.707626
Cad99C	3R:25667378-25683191	72.1008	52.8015	-0.449438	0.00135	0.0205205	no	0.732329
Caps	4:1235703-1275487	3.5415	1.89837	-0.899597	0.0002	0.00398402	no	0.536036
Cda5	2L:25401-59242	3.01499	0.392961	-2.9397	5e-05	0.00115716	no	0.130336
CG10062	2R:15263229-15267679	2.47601	0.0378432	-6.03184	0.00205	0.028618	no	0.0152839
CG10598	X:17119743-17120474	1.21492	0	#NAME?	0.0006	0.0103051	no	0
CG10943	3L:12854891-12855818	0.784895	0	#NAME?	5e-05	0.00115716	no	0
CG11071	X:13744880-13751157	2.03294	0.712768	-1.51207	5e-05	0.00115716	no	0.350609
CG11318	3R:26932087-26934910	0.69569	0	#NAME?	5e-05	0.00115716	no	0
CG11865	2L:15617001-15617794	0.585742	0	#NAME?	5e-05	0.00115716	no	0
CG12974	3L:21275113-21279062	4.60836	0.574449	-3.004	0.00025	0.00480452	no	0.124654
CG13067	3L:16264401-16265018	1.34393	0	#NAME?	0.0005	0.00879536	no	0
CG13227	2R:7122758-7123260	0.958324	0	#NAME?	5e-05	0.00115716	no	0
CG13305	3L:8638011-8639918	4.51408	1.24569	-1.85749	0.00345	0.0437518	no	0.275957
CG13618	3R:20350521-20353261	3.90945	0.925819	-2.07816	0.004	0.0489481	no	0.236816
CG13640	3R:20687380-20687884	0.805056	0	#NAME?	0.00045	0.00801276	no	0
CG13694	2L:115364-116488	0.855539	0	#NAME?	5e-05	0.00115716	no	0
CG13796	2L:7727149-7732668	3.51393	1.00184	-1.81043	0.0014	0.0211698	no	0.285105
CG14324	3R:13444000-13444513	2.29997	0	#NAME?	5e-05	0.00115716	no	0
CG14709	3R:7394971-7404467	2.04773	0.534686	-1.93726	0.0014	0.0211698	no	0.261112
CG14795	X:1406259-1406832	4.66294	0	#NAME?	5e-05	0.00115716	no	0
CG15279	2L:14844992-14851749	3.85081	0.588143	-2.71092	0.00045	0.00801275	no	0.152732
CG15422	2L:4004983-4005670	1.99851	0	#NAME?	5e-05	0.00115716	no	0
CG1623	2R:5715605-5724147	1.67391	0.385014	-2.12024	0.00395	0.048609	no	0.230009
CG16996	2L:12109456-12110522	1.78083	0	#NAME?	5e-05	0.00115716	no	0
CG1718	X:21163740-21171389	2.3776	0.459636	-2.37094	0.0001	0.00220328	no	0.193319
CG17265	2L:3013500-3016069	30.8498	21.0087	-0.554276	0.0018	0.0256618	no	0.681
CG18522	3R:11357858-11363010	1.38317	0.281895	-2.29475	0.00105	0.016418	no	0.203804
CG18577	3R:7021825-7023007	0.750736	0	#NAME?	5e-05	0.00115716	no	0
CG18628	3L:10632870-10633236	3.14493	0	#NAME?	0.00185	0.0261609	no	0
CG30015	2R:6726598-6762229	29.7625	20.6675	-0.526132	0.00035	0.00648355	no	0.694414
CG30115	2R:14441623-14500235	22.2133	16.1626	-0.45876	0.0024	0.0325661	no	0.727609
CG30345	2R:5036331-5038809	3.75312	0.210498	-4.15621	0.0019	0.0266519	no	0.0560861
CG30456	2R:12990371-12995047	2.46808	0.614504	-2.00589	0.00335	0.0427947	no	0.248981
CG3091	X:2146364-2148163	3.2813	0.195631	-4.06806	0.0004	0.00727083	no	0.05962
CG31150	3R:11670187-11679301	4.50566	1.28188	-1.81348	0.0001	0.00220328	no	0.284504
CG31371	3R:26326923-26329082	1.34933	0	#NAME?	5e-05	0.00115716	no	0
CG3164	2L:122623-130791	103.518	77.0601	-0.42582	0.00185	0.0261609	no	0.744413
CG31689	2L:2730105-2739833	1.44143	0.188834	-2.9323	5e-05	0.00115716	no	0.131005
CG32073	3L:11100107-11100476	3.71667	0	#NAME?	5e-05	0.00115716	no	0
CG32196	3L:18452568-18454124	3.32168	0.375326	-3.1457	0.0035	0.0441932	no	0.112993
CG32486	3L:3055903-3070839	55.0808	36.9002	-0.577924	5e-05	0.00115716	no	0.669929
CG32603	X:14078573-14079840	1.05188	0	#NAME?	0.0004	0.00727083	no	0
CG33110	3R:18395910-18406120	3.66232	0.092004	-5.31492	0.0029	0.0379917	no	0.0251218
CG33120	2L:18841398-18844557	1.91933	0.295676	-2.69851	0.00015	0.00313849	no	0.154052
CG33291	3L:21638059-21659405	53.6926	39.3543	-0.448202	0.00175	0.0251131	no	0.732956
CG34022	3L:1206064-1206789	2.30295	0	#NAME?	5e-05	0.00115716	no	0
CG34205	2R:18017833-18018715	1.91587	0	#NAME?	0.0018	0.0256618	no	0
CG34252	3L:18063389-18066482	4.01684	0.286056	-3.81169	5e-05	0.00115716	no	0.0712142
CG34327	X:17117155-17117848	0.850261	0	#NAME?	0.00225	0.0308667	no	0
CG3655	X:967930-1028547	27.5327	19.6235	-0.488565	0.0007	0.0116778	no	0.712734
CG42377	3L:277436-290334	3.53549	0.940371	-1.91061	5e-05	0.00115716	no	0.26598
CG42728	3L:15520719-15521296	3.814	0	#NAME?	5e-05	0.00115716	no	0
CG4363	2R:17721734-17722534	1.51254	0	#NAME?	0.0001	0.00220328	no	0
CG4893	3L:16347844-16352525	2.45668	0.224278	-3.45335	0.00175	0.0251131	no	0.0912931
CG5009	2R:13648437-13652065	24.4837	16.5057	-0.568858	0.0018	0.0256618	no	0.674151
CG5326	3R:18357895-18365639	36.2162	24.2036	-0.581414	0.0016	0.0235413	no	0.668309
CG5455	3R:22287250-22295732	3.10743	0.611241	-2.34591	0.0002	0.00398402	no	0.196703
CG5849	3R:17565826-17570153	1.24413	0.0730099	-4.0909	0.00115	0.0177903	no	0.0586835
CG6026	3R:14865233-14869965	4.074	0.717765	-2.50486	0.00025	0.00480452	no	0.176182
CG6277	3R:22847790-22848934	1.83461	0	#NAME?	5e-05	0.00115716	no	0
CG6327	3L:11029457-11044469	1.4803	0.120727	-3.61606	0.00055	0.00954026	no	0.0815558
CG6398	X:17724872-17735630	263.288	177.1	-0.572077	5e-05	0.00115716	no	0.672647
CG7299	2L:10683766-10684407	0.725783	0	#NAME?	0.00155	0.0229216	no	0
CG7497	3L:17626548-17631040	3.80771	0.968474	-1.97514	0.00285	0.0374492	no	0.254346
CG7802	3R:25644833-25651522	264.268	201.019	-0.394673	0.00345	0.0437518	no	0.760663
CG8086	2L:8244158-8257502	4.89275	0.366213	-3.73989	5e-05	0.00115716	no	0.0748481
CG8654	2R:15868573-15872262	4.09153	1.21547	-1.75112	0.0022	0.030276	no	0.29707
CG8925	3R:11997730-12006200	1.97571	0.158146	-3.64304	0.00015	0.00313849	no	0.0800451
CG9380	2R:21071151-21076360	2.51447	0.095274	-4.72203	0.00095	0.0151809	no	0.0378903
CG9400	X:14182116-14195901	1.84179	0	#NAME?	5e-05	0.00115716	no	0
ck	2L:15044962-15057848	48.8442	36.3904	-0.424628	0.00155	0.0229216	no	0.74503
Cpr47Ed	2R:7148817-7149295	3.80412	0	#NAME?	5e-05	0.00115716	no	0
CPTI	2R:6356123-6366073	89.7047	64.7545	-0.470205	0.00165	0.0239538	no	0.721863
Cyp311a1	X:11923316-11925498	0.980606	0.106975	-3.1964	0.00085	0.0137338	no	0.109091
d	2L:8466829-8488671	187.165	132.118	-0.502483	0.0007	0.0116778	no	0.705891
dro3	3L:3314995-3315356	2.44918	0	#NAME?	0.00035	0.00648355	no	0
E2f	3R:17446025-17486127	37.8327	27.3504	-0.468073	0.0006	0.0103051	no	0.72293
Eip78C	3L:21220018-21257721	57.3705	41.221	-0.47693	0.00235	0.0320371	no	0.718505
Eip93F	3R:17774835-17837910	1.33441	0.206378	-2.69284	5e-05	0.00115716	no	0.154659
Ela	3R:20691072-20692425	2.64391	0.481351	-2.45751	0.00405	0.0494213	no	0.18206
Faa	3L:4072031-4073949	4.93537	1.16474	-2.08316	0.0027	0.0357473	no	0.235999
fng	3L:20918982-20942609	197.456	143.932	-0.456145	0.001	0.0158348	no	0.728932
fu12	2L:8449690-8463990	3.14132	0.531261	-2.56388	0.00045	0.00801275	no	0.16912
fz3	X:664060-677344	40.8033	27.4376	-0.572532	0.00065	0.0110336	no	0.672436
gol	2R:20960149-20971843	2.18789	0.26923	-3.02263	5e-05	0.00115716	no	0.123055
gpp	3R:2232578-2273729	32.4472	23.6923	-0.453672	0.00095	0.0151809	no	0.73018
Klp98A	3R:23373495-23384836	24.617	17.1879	-0.518267	0.00055	0.00954026	no	0.698213
l(2)05510	2R:16450539-16469633	113.048	79.3799	-0.51009	0.0004	0.00727083	no	0.702179
lmd	3R:18846943-18852435	3.95613	0.0817279	-5.59712	0.0032	0.0414243	no	0.0206585
Mhcl	3R:11894244-11924483	35.6163	23.8267	-0.579958	0.0024	0.0325661	no	0.668983
Muc26B	2L:6151970-6153701	1.3732	0	#NAME?	5e-05	0.00115716	no	0
Mur2B	X:1417932-1553962	4.99625	0.147326	-5.08377	0.00105	0.016418	no	0.0294873
nompA	2R:7197952-7206180	1.98674	0.217364	-3.19222	5e-05	0.00115716	no	0.109407
Obp56b	2R:15586346-15586822	1.77614	0	#NAME?	0.00015	0.00313849	no	0
obst-B	2L:10032693-10038954	112.191	78.6045	-0.513277	0.00355	0.0445665	no	0.700631
Orct2	3R:20098752-20101013	41.8253	28.5423	-0.551275	0.00165	0.0239538	no	0.682417
Osi20	3R:2165818-2167146	0.851229	0	#NAME?	5e-05	0.00115716	no	0
pk	2R:3038206-3110885	54.4323	39.7884	-0.452114	0.0031	0.0404297	no	0.73097
pst	3L:7350374-7353363	62.8245	43.5361	-0.529116	0.0002	0.00398402	no	0.69298
ptr	X:2239165-2248298	4.36867	2.04766	-1.09322	0.00105	0.016418	no	0.468715
Rcd2	3L:20521067-20533514	3.42093	0.646602	-2.40344	0.001	0.0158348	no	0.189014
ref(2)P	2L:19542445-19546914	80.744	57.7016	-0.484744	0.0015	0.0224101	no	0.714624
Samuel	2L:11013220-11066997	21.1589	14.8774	-0.508145	0.00155	0.0229216	no	0.703127
scrib	3R:22362067-22429773	50.0565	37.3244	-0.423436	0.0015	0.0224101	no	0.745645
Ser	3R:22997817-23019716	71.3184	53.9205	-0.403441	0.00255	0.0342288	no	0.756053
shep	3L:5153785-5271044	26.0614	17.7445	-0.554546	0.0004	0.00727083	no	0.680873
sns	2R:4686021-4743142	4.52716	2.07877	-1.12288	5e-05	0.00115716	no	0.459177
Socs36E	2L:18138667-18152410	40.8305	27.4254	-0.574138	0.00015	0.00313849	no	0.671689
stg	3R:25077539-25081502	24.2888	16.2531	-0.579576	0.0003	0.00572757	no	0.66916
su(r)	X:9090838-9096770	2.69421	0.144507	-4.22064	0.00265	0.0353536	no	0.0536361
Synd	3R:16658506-16665840	43.2984	30.109	-0.52412	0.0004	0.00727083	no	0.695384
Tig	2L:6412314-6423308	2.672	1.13506	-1.23516	0.00375	0.0468079	no	0.424798
ttk	3R:27539590-27561114	106.874	75.9943	-0.491949	0.00025	0.00480452	no	0.711064
Ubc-E2H	X:7982034-7988097	30.9357	22.8053	-0.439904	0.00305	0.0398372	no	0.737184
Vinc	X:2108318-2116492	50.4367	37.055	-0.444806	0.00175	0.0251131	no	0.734683
wb	2L:14263521-14328262	17.197	11.7804	-0.545769	0.00015	0.00313849	no	0.685026
ZnT63C	3L:3303721-3313480	72.6231	50.6396	-0.520162	0.0008	0.0130224	no	0.697293
